# Supplementary material for: High capacity micro-mesoporous carbon–sulfur nanocomposite cathodes with enhanced cycling stability prepared by a solvent-free procedure
Source: Royal Society of Chemistry journal article supplement (doi:10.1039/c3ta10641a), 2013-01-01
Supplement: c3ta10641a.pdf [file c3ta10641a.pdf]

## Supplementary Information

# High capacity micro-mesoporous carbon/sulfur nanocomposite cathodes with enhanced cycling stability prepared by a solvent-free procedure

*Sören Thieme<sup>1</sup>, Jan Brückner<sup>1</sup>, Ingolf Bauer<sup>1</sup>, Martin Oschatz<sup>2</sup>, Lars Borchardt<sup>2</sup>, Holger Althues<sup>1</sup>, and Stefan Kaskel<sup>1,2,\*</sup>*

<sup>1</sup> *Fraunhofer Institute for Material and Beam Technology (IWS), Winterbergstraße 28, D-01277 Dresden, Germany*

<sup>2</sup> *Department of Inorganic Chemistry, Dresden University of Technology, Bergstraße 66, D-01062 Dresden, Germany*

**\*Corresponding author.** Phone: +49-35146333632; E-mail: stefan.kaskel@chemie.tu-dresden.de

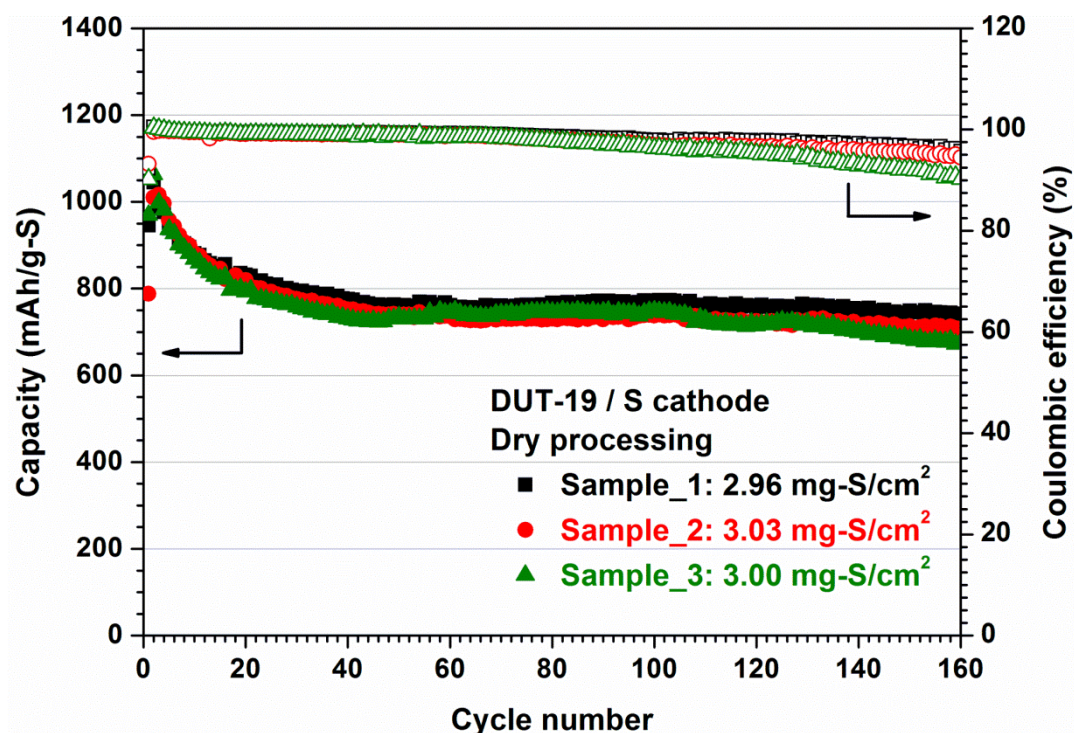

**Supplementary Figure S1:** Reproducibility of sulfur utilization for three cells with similar sulfur loading under equal measurement conditions. All samples were received from the same electrode sheet.

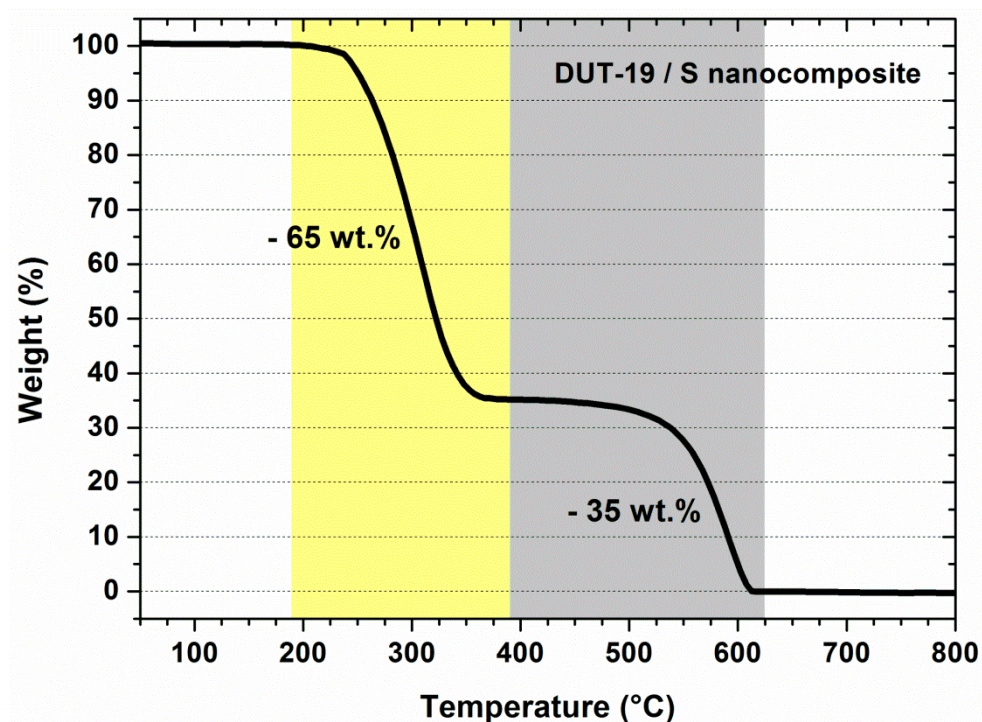

**Supplementary Figure S2:** Thermogravimetric analysis of DUT-19/S composite. The weight loss of the two plateaus corresponds well to the initial sulfur-to-carbon ratio of 2:1.

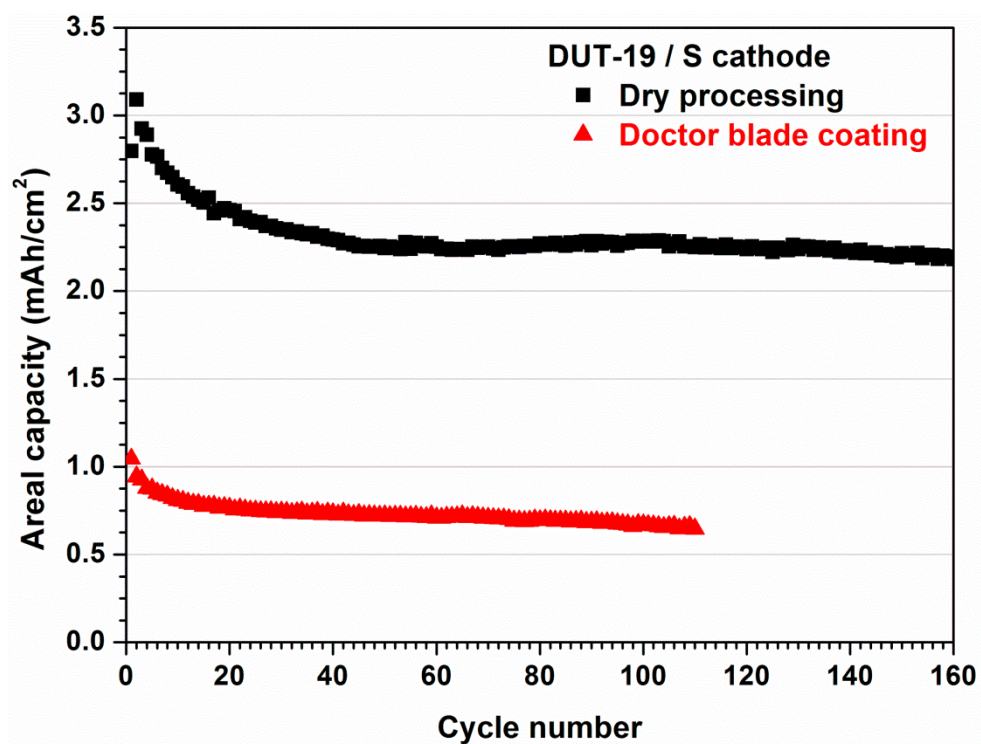

**Supplementary Figure S3:** Areal capacity of solvent-free processed and doctor blade coated electrodes. Due to the higher sulfur surface loading in the dry processed samples the areal capacity is about 2.5 times higher than for conventional cathodes.
